# Supplementary material for: Genomic Evaluation of Primiparous High-Producing Dairy Cows: Inbreeding Effects on Genotypic and Phenotypic Production–Reproductive Traits
Source: MDPI journal article supplement (doi:10.3390/ani10091704), 2020-09-21
Supplement: s1 [file s1]

**Table S2. Definition of genomic/phenotypic parameters for reproductive traits in high-producing primiparous dairy cows (Supplementary Materials)**

| Traits and Indexes                                 | Nomenclature | Units  | Description                                                                                                                                                                                                                                                                                                                                     | Parameter Type |
|----------------------------------------------------|--------------|--------|-------------------------------------------------------------------------------------------------------------------------------------------------------------------------------------------------------------------------------------------------------------------------------------------------------------------------------------------------|----------------|
| Fertility Index                                    | FIG          | points | Estimates the reproductive efficiency in a female or a group of animals and incorporates several specific traits such as DPRG, CCRG, HCRG, DCEG, MTRG, RPRG.                                                                                                                                                                                    | Genotype       |
| Heifer Conception Rate                             | HCRG         | %      | Estimates the increased percentage for the conception of the heifer, defined as the % of heifers inseminated that became pregnant in each service. HCR of 1 implies that the daughters of that heifer should be 1% more likely to become pregnant than the daughters of a heifer with a value of 0.                                             | Genotype       |
| Daughter's Pregnancy Rate                          | DPRG         | %      | Estimates the genetic ability of the animal for better reproductive efficiency and is expressed as the expected percentage difference, compared to the breed average, that an unpregnant cow will become pregnant during each 21-day estrous cycle. A 1.0 percent increase in DPRG is equivalent to a decrease of approximately four days open. | Genotype       |
| Cow Conception Rate                                | CCRG         | %      | Estimates the genetic ability to conceive of the lactating cow defined as the percentage of inseminated cows that become pregnant in each service. A CCRG of 1 implies that daughters of that cow will be 1% more likely to become pregnant during lactation than daughters of a cow with a score of 0.                                         | Genotype       |
| Daughter's Calving Ease                            | DCEG         | %      | Estimates the genetic ability of a female to calve easily and is expressed as a percentage of dystocic deliveries for first calf-heifers. Lower numbers reflect easier calvings.                                                                                                                                                                | Genotype       |
| Metritis Resistance                                | MTRG         | %      | Estimates the genetic resistance of heifers to metritis.                                                                                                                                                                                                                                                                                        | Genotype       |
| Resistance to Placental Retention                  | RPRG         | %      | Estimates the genetic resistance of heifers to retained placenta.                                                                                                                                                                                                                                                                               | Genotype       |
| Weight at the First Service                        | WFS          | kg     | Evaluates the optimal weight of the heifer according to the breed at first service.                                                                                                                                                                                                                                                             | Phenotype      |
| Number of Services per Conception: Nulliparous Cow | NSCNC        | unit   | Evaluates the average number of precise inseminations in a group of nulliparous cows to generate a pregnancy.                                                                                                                                                                                                                                   | Phenotype      |
| Days of Gestation                                  | DG           | days   | Assesses the number of days the female remained pregnant until delivery.                                                                                                                                                                                                                                                                        | Phenotype      |
| Number of Services per Conception: Cow             | NSCC         | unit   | Evaluates the average number of precise inseminations in a group of cows to generate a pregnancy. Informs about the fertility of the cows that were successful in reproduction.                                                                                                                                                                 | Phenotype      |
| Days in Milk at First Breeding                     | DMFB         | days   | Assesses the number of lactation days from birth to the first service.                                                                                                                                                                                                                                                                          | Phenotype      |
| Days in Anestrous Post-Voluntary Waiting Period    | DAPVWP       | days   | Evaluates the number of post-partum days from voluntary waiting time to first insemination; values > 18 days determine anestrus.                                                                                                                                                                                                                | Phenotype      |
| Calving to Conception Interval                     | CCI          | days   | Assesses the time elapsed from birth to actual pregnancy.                                                                                                                                                                                                                                                                                       | Phenotype      |
| Days Open Post Service                             | DOPS         | days   | Evaluates the period between the first insemination and the fertilizing insemination.                                                                                                                                                                                                                                                           | Phenotype      |
| Efficiency in Heat Detection                       | EHD          | %      | Evaluates the average percentage in which oestrus is detected over a period of 21 days obtained by dividing 21 by the average interval between heats x 100 ((21 / AIHI) x 100).                                                                                                                                                                 | Phenotype      |
| Minimum Projected Inter-Partum Period              | MPJIPP       | days   | Evaluates the time elapsed (as an adjusted projection) between one calving and another in the same cow.                                                                                                                                                                                                                                         | Phenotype      |
| Current Inter-Partum Period                        | CIPP         | days   | Evaluates the period between one calving and another in the same cow.                                                                                                                                                                                                                                                                           | Phenotype      |
