# Supplementary material for: Genomic Evaluation of Primiparous High-Producing Dairy Cows: Inbreeding Effects on Genotypic and Phenotypic Production–Reproductive Traits
Source: MDPI journal article supplement (doi:10.3390/ani10091704), 2020-09-21
Supplement: s1 [file s1]

**Table S1. Definition of genotypic/phenotypic parameters for production traits in high-producing primiparous cows (Supplementary Materials)**

| Traits and Indexes                           | Nomenclature | Units                | Description                                                                                                                                                     | Parameter Type |
|----------------------------------------------|--------------|----------------------|-----------------------------------------------------------------------------------------------------------------------------------------------------------------|----------------|
| Milk production at 305d                      | MP305G       | lbs                  | Evaluates genetic differences in total pounds of milk produced during a 305-day lactation.                                                                      | Genotype       |
| Fat percentage at 305d                       | PF305G       | %                    | Evaluates genetic differences in the percentage of milk fat produced during a 305-day lactation.                                                                | Genotype       |
| Somatic Cell Count                           | SCCG         | Score                | Indirectly assesses susceptibility to mastitis. A low value indicates a more favourable value of somatic cells throughout lactation compared to the breed base. | Genotype       |
| Milk Protein production at 305d              | MPPROT305G   | lbs                  | Evaluates genetic differences in pounds of milk-protein produced during a 305-day lactation.                                                                    | Genotype       |
| Protein percentage at 305d                   | PP305G       | %                    | Evaluates genetic differences in percentage of milk-protein produced during a 305-day lactation.                                                                | Genotype       |
| Milk fat production at 305d                  | MPFAT305G    | lbs                  | Evaluates genetic differences in pounds of milk-fat produced during a 305-day lactation.                                                                        | Genotype       |
| Mastitis Resistance                          | MRG          | %                    | Evaluates an animal's genetic resistance to mastitis. High values are consistent with animals with greater resistance to mastitis.                              | Genotype       |
| Total Litres of Milk                         | TLM          | L                    | Evaluates the total litres of milk produced during a 305-day lactation.                                                                                         | Phenotype      |
| Total Fat                                    | TFAT         | lbs                  | Evaluates the amount of fat produced during a 305-day lactation.                                                                                                | Phenotype      |
| Total Protein                                | TPROT        | lbs                  | Evaluates the amount of protein produced during a 305-day lactation.                                                                                            | Phenotype      |
| Milk projection at 305 d                     | MPJ305       | L                    | Evaluates the amount of milk projected for a 305-day lactation.                                                                                                 | Phenotype      |
| Average Litres of milk                       | ALM          | L                    | Evaluates the average milk in litres produced per day.                                                                                                          | Phenotype      |
| Fat Percentage                               | FATP         | %                    | Evaluates the percentage of fat per litre of milk produced.                                                                                                     | Phenotype      |
| Protein Percentage                           | PROTP        | %                    | Evaluates the percentage of protein per litre of milk produced.                                                                                                 | Phenotype      |
| Litres of Current Corrected Milk             | LCCM         | L                    | Evaluates the current amount of milk produced corrected to 305 days of lactation.                                                                               | Phenotype      |
| Milk Projection 305 days Maturity Equivalent | MPJ305ME     | L                    | Estimates the projected milk production at 305 days which is equivalent to accumulated production maturity in each month.                                       | Phenotype      |
| Somatic Cell Count                           | SCC          | x10 <sup>3</sup> /mL | Assesses the value of somatic cell concentration throughout lactation.                                                                                          | Phenotype      |
| Logarithm of Somatic Cell Count              | LGSCC        | Log2-Score           | Assesses the value of the adjusted somatic cell number in a lactation.                                                                                          | Phenotype      |
| Urea                                         | U            | mg/dL                | Evaluates a value that reflects the ureic nitrogen to a correct energy/protein balance.                                                                         | Phenotype      |
